# Supplementary material for: Rapid and comprehensive identification of chemical constituents in Mai-Luo-Shu-Tong pill by UHPLC-Q-Orbitrap HRMS combined with a data mining strategy
Source: Royal Society of Chemistry journal article supplement (doi:10.1039/d2ay01453j), 2022-01-01
Supplement: d2ay01453j1.pdf [file d2ay01453j1.pdf]

**Table S1 Compounds of MLSTP**

| NO. | Compound                   | t <sub>R</sub> /min | Molecular formula                               | Ion mode | Theoretical m/z | Measured m/z | Delat (ppm) | MS/MS fragments                                             | Compound source |
|-----|----------------------------|---------------------|-------------------------------------------------|----------|-----------------|--------------|-------------|-------------------------------------------------------------|-----------------|
| 1   | sucrose                    | 1.14                | C <sub>12</sub> H <sub>22</sub> O <sub>11</sub> | N        | 341.10893       | 341.10846    | 1.824       | 341.11,179.06,161.04,143.03,119.03,101.02,89.02,71.01,59.01 | a               |
| 2   | quinic acid                | 1.19                | C <sub>7</sub> H <sub>12</sub> O <sub>6</sub>   | N        | 191.05611       | 191.05588    | 4.530       | 191.06,127.04,85.03                                         | b               |
| 3   | gallic acid                | 1.87                | C <sub>7</sub> H <sub>6</sub> O <sub>5</sub>    | N        | 169.01425       | 169.01393    | 0.780       | 169.01,125.02,97.03,81.03                                   | a               |
| 4   | protocatechuic acid*       | 3.40                | C <sub>7</sub> H <sub>6</sub> O <sub>4</sub>    | N        | 153.01933       | 153.01913    | 0.895       | 153.02,123.05,109.03,108.02                                 | c               |
| 5   | hydroxytyrosol*            | 3.60                | C <sub>8</sub> H <sub>10</sub> O <sub>3</sub>   | N        | 153.05571       | 153.05545    | 0.829       | 153.06,123.05,109.03                                        | d               |
| 6   | 5-o-caffeoylquinic acid    | 4.07                | C <sub>16</sub> H <sub>18</sub> O <sub>9</sub>  | P        | 355.10247       | 355.10181    | -1.545      | 355.07,163.04,145.03,135.04                                 | b               |
| 7   | loganin                    | 4.74                | C <sub>17</sub> H <sub>26</sub> O <sub>10</sub> | N        | 389.14532       | 389.14523    | 2.587       | 389.15,343.14,181.09,161.04,151.08,136.05,109.06            | b               |
| 8   | 3,4-dihydroxybenzaldehyde* | 5.59                | C <sub>7</sub> H <sub>7</sub> O <sub>3</sub>    | P        | 139.03897       | 139.03900    | 0.211       | 139.04,112.05,111.04,93.03                                  | c               |
| 9   | loganic acid*              | 6.29                | C <sub>16</sub> H <sub>24</sub> O <sub>10</sub> | N        | 375.12967       | 375.12955    | 2.604       | 375.13,213.08,169.09,151.08                                 | b               |
| 10  | loganic acid qt            | 6.43                | C <sub>10</sub> H <sub>14</sub> O <sub>5</sub>  | P        | 215.09140       | 215.09137    | -0.140      | 215.09,197.08,179.07,161.06,151.08,133.06,109.06,81.07      | b               |
| 11  | methyl gallate             | 6.62                | C <sub>8</sub> H <sub>8</sub> O <sub>5</sub>    | N        | 183.02989       | 183.02957    | 4.208       | 183.03,168.01,124.02                                        | a               |
| 12  | osmanthuside               | 6.80                | C <sub>19</sub> H <sub>28</sub> O <sub>11</sub> | N        | 431.15467       | 431.15579    | 2.324       | 431.16,299.11,191.06,149.04,89.03                           | e               |

|    |                         |      |                                                 |   |           |           |        |                                                 |   |
|----|-------------------------|------|-------------------------------------------------|---|-----------|-----------|--------|-------------------------------------------------|---|
|    | H                       |      |                                                 |   |           |           |        | 02,59.01                                        |   |
| 13 | oxypaeoniflorin*        | 7.06 | C <sub>23</sub> H <sub>28</sub> O <sub>12</sub> | N | 495.15079 | 495.15012 | 0.843  | 495.15,333.10,195.07,137.02,93.03               | a |
| 14 | skimmetin*              | 7.13 | C <sub>9</sub> H <sub>6</sub> O <sub>3</sub>    | P | 163.03908 | 163.03870 | -1.660 | 163.04,145.03,135.04,117.03,89.04               | e |
| 15 | chlorogenic acid*       | 7.13 | C <sub>16</sub> H <sub>18</sub> O <sub>9</sub>  | N | 353.08781 | 353.08743 | 0.721  | 353.09,191.06,179.03,173.05,135.04              | b |
| 16 | 6-O-methylcatalpol      | 7.39 | C <sub>16</sub> H <sub>24</sub> O <sub>10</sub> | N | 375.12967 | 375.12964 | 2.844  | 375.13,195.07,169.09,151.08,113.02,69.03        | d |
| 17 | vanillic acid           | 7.63 | C <sub>8</sub> H <sub>8</sub> O <sub>4</sub>    | N | 167.03498 | 167.03462 | 0.735  | 167.03,123.05,95.05                             | f |
| 18 | methyl chlorogenate     | 7.75 | C <sub>17</sub> H <sub>20</sub> O <sub>9</sub>  | N | 367.10345 | 367.10315 | 2.156  | 367.10,193.05,134.04                            | b |
| 19 | 6-hydroxycoumarin       | 7.80 | C <sub>9</sub> H <sub>6</sub> O <sub>3</sub>    | P | 163.03868 | 163.03870 | -1.782 | 163.04,145.03,135.04,117.03,89.04               | e |
| 20 | caffeate*               | 7.81 | C <sub>9</sub> H <sub>8</sub> O <sub>4</sub>    | N | 179.03498 | 179.03467 | 0.785  | 179.03,135.05,117.03,107.05                     | b |
| 21 | cryptochlorogenic acid  | 7.81 | C <sub>16</sub> H <sub>18</sub> O <sub>9</sub>  | P | 355.10247 | 355.10168 | -1.911 | 355.07,163.04,145.03,135.04                     | b |
| 22 | 3-o-feruloylquinic acid | 7.84 | C <sub>17</sub> H <sub>20</sub> O <sub>9</sub>  | P | 369.11812 | 369.11719 | -2.218 | 369.19,177.05,145.03,117.03                     | b |
| 23 | isoscopoletin           | 7.95 | C <sub>10</sub> H <sub>8</sub> O <sub>4</sub>   | P | 193.04953 | 193.04924 | -1.530 | 193.05,179.03,178.03,151.04,137.06,133.03,95.05 | c |
| 24 | secologanate            | 8.33 | C <sub>16</sub> H <sub>22</sub> O <sub>10</sub> | P | 375.12857 | 375.12775 | -2.195 | 375.21,359.06,305.13,285.18,256.18              | b |
| 25 | secologanic             | 8.35 | C <sub>10</sub> H <sub>12</sub> O <sub>5</sub>  | P | 213.07575 | 213.07549 | -1.220 | 213.08,195.07,177.05,151.04,10                  | b |

|    |                                               |      |                                                  |   |           |           |        |                                                                             |   |
|----|-----------------------------------------------|------|--------------------------------------------------|---|-----------|-----------|--------|-----------------------------------------------------------------------------|---|
|    | acid Qt                                       |      |                                                  |   |           |           |        | 7.05,95.05,79.05                                                            |   |
| 26 | paeonin b Qt                                  | 8.71 | C <sub>10</sub> H <sub>12</sub> O <sub>4</sub>   | P | 197.08095 | 197.08047 | -1.854 | 197.08,179.07,151.08,137.06,                                                | a |
| 27 | phellodenol A                                 | 8.73 | C <sub>11</sub> H <sub>10</sub> O <sub>4</sub>   | P | 207.06518 | 207.06482 | -1.764 | 207.06,179.07,163.04,151.08                                                 | g |
| 28 | n-methylhigenamine-7-O-beta-D-glucopyranoside | 9.00 | C <sub>23</sub> H <sub>29</sub> O <sub>8</sub> N | P | 448.19670 | 448.19632 | -0.610 | 448.20,286.14,255.10,107.05                                                 | e |
| 29 | 8-epiloganin Qt                               | 9.25 | C <sub>11</sub> H <sub>16</sub> O <sub>5</sub>   | P | 229.10705 | 227.09103 | -1.630 | 229.11,211.10,197.08,179.07,161.06,151.08,137.06,133.06,109.06,105.07,81.07 | b |
| 30 | isocorypalmine*                               | 9.36 | C <sub>20</sub> H <sub>23</sub> NO <sub>4</sub>  | N | 340.15543 | 340.15521 | 2.573  | 340.16,325.13,310.11,282.11,252.04,224.05                                   | g |
| 31 | methyl-p-coumarate*                           | 9.64 | C <sub>10</sub> H <sub>10</sub> O <sub>3</sub>   | P | 179.07027 | 179.07008 | -1.065 | 179.07,161.06,151.08,147.04,133.06,123.08,109.06,105.07,103.05,79.05        | b |
| 32 | sweroside*                                    | 9.66 | C <sub>16</sub> H <sub>22</sub> O <sub>9</sub>   | P | 359.13366 | 359.13287 | -0.789 | 359.13,197.08,179.09,151.08,127.04,97.03,85.03                              | b |
| 33 | sweroside aglycone                            | 9.71 | C <sub>10</sub> H <sub>12</sub> O <sub>4</sub>   | P | 197.08083 | 197.08044 | -2.006 | 197.08,179.07,169.05,161.06,151.08,137.06,127.04,111.08,97.03               | b |
| 34 | coumarin                                      | 9.93 | C <sub>9</sub> H <sub>6</sub> O <sub>2</sub>     | P | 147.04405 | 147.04384 | -1.469 | 147.04,119.05,91.05                                                         |   |
| 35 | methyl salicylate                             | 9.96 | C <sub>8</sub> H <sub>8</sub> O <sub>3</sub>     | P | 153.05473 | 153.05437 | -1.638 | 153.05,125.06,111.04,93.03,65.04                                            | e |
| 36 | paeoniflorin*                                 | 9.96 | C <sub>23</sub> H <sub>28</sub> O <sub>11</sub>  | P | 481.17043 | 481.16956 | -1.825 | 481.17,319.12,301.11,197.08,179.07,151.08,133.06,105.03                     | a |

|    |                         |       |                                                 |   |           |           |        |                                                                      |   |
|----|-------------------------|-------|-------------------------------------------------|---|-----------|-----------|--------|----------------------------------------------------------------------|---|
| 37 | 5-o-feruloylquinic acid | 10.34 | C <sub>17</sub> H <sub>20</sub> O <sub>9</sub>  | P | 369.11812 | 369.11740 | -1.649 | 369.19,177.05,145.03,117.03                                          | b |
| 38 | 3-coumaric acid         | 10.68 | C <sub>9</sub> H <sub>8</sub> O <sub>3</sub>    | P | 165.05462 | 165.05435 | -1.640 | 165.05,137.06,133.03,109.06,95.05                                    | b |
| 39 | 4-methoxycinnamic acid  | 10.76 | C <sub>10</sub> H <sub>10</sub> O <sub>3</sub>  | P | 179.07027 | 179.07007 | -1.121 | 179.07,161.06,147.04,133.06,118.04,109.06,103.05,79.05               | d |
| 40 | ferulic acid*           | 10.89 | C <sub>10</sub> H <sub>10</sub> O <sub>4</sub>  | P | 195.06518 | 193.04927 | -1.374 | 195.06,177.05,163.04,149.06,145.03,134.04,117.03,89.04               | e |
| 41 | genipin                 | 10.89 | C <sub>11</sub> H <sub>14</sub> O <sub>5</sub>  | P | 227.0914  | 227.09093 | -2.070 | 227.09,209.08,195.07,177.05,167.07,165.05,151.04,139.04,107.05,95.05 | b |
| 42 | 4-coumaric acid*        | 10.95 | C <sub>9</sub> H <sub>8</sub> O <sub>3</sub>    | P | 165.05462 | 165.05431 | -1.882 | 165.05,137.06,133.03,109.06,95.05                                    | b |
| 43 | dihydrocaffeic acid     | 10.95 | C <sub>9</sub> H <sub>10</sub> O <sub>4</sub>   | P | 183.06518 | 183.06482 | -1.996 | 183.07,165.05,151.04,140.05,123.04,95.05                             | b |
| 44 | scopoletol*             | 10.95 | C <sub>10</sub> H <sub>8</sub> O <sub>4</sub>   | P | 193.04953 | 193.04933 | -1.063 | 193.05,179.03,178.03,151.04,137.06,133.03,95.05                      | c |
| 45 | phellodenol B           | 10.95 | C <sub>11</sub> H <sub>10</sub> O <sub>4</sub>  | P | 207.06530 | 207.06474 | -2.151 | 207.06,179.07,163.04,151.08                                          | g |
| 46 | secoxyloganin           | 10.95 | C <sub>17</sub> H <sub>24</sub> O <sub>11</sub> | P | 405.13913 | 405.13791 | -3.031 | 405.16,243.09,225.08,165.05,151.04,139.04,125.02,95.05,85.03,69.03   | b |
| 47 | secologanin*            | 11.18 | C <sub>17</sub> H <sub>24</sub> O <sub>10</sub> | P | 389.14422 | 389.14374 | -1.242 | 389.17,209.08,195.07,177.05,165.05,151.04,107.05,95.05               | b |
| 48 | schaftoside             | 11.24 | C <sub>26</sub> H <sub>28</sub> O <sub>16</sub> | N | 595.13045 | 595.13019 | 1.393  | 595.13,300.03,271.03,255.03                                          | c |

|    |                                   |       |                                                 |   |           |           |        |                                                               |   |
|----|-----------------------------------|-------|-------------------------------------------------|---|-----------|-----------|--------|---------------------------------------------------------------|---|
| 49 | geniposide                        | 11.47 | C <sub>17</sub> H <sub>24</sub> O <sub>10</sub> | P | 389.14422 | 389.14389 | -0.857 | 389.14,209.08,177.05,165.05,151.04,107.05,95.05               | d |
| 50 | isoferulic acid                   | 11.71 | C <sub>10</sub> H <sub>10</sub> O <sub>4</sub>  | P | 195.06518 | 195.06438 | -0.804 | 195.06,177.05,163.04,149.06,145.03,134.04,117.03,89.04        | e |
| 51 | kaempferol<br>3,7-<br>diglucoside | 11.74 | C <sub>27</sub> H <sub>30</sub> O <sub>16</sub> | P | 611.16066 | 611.15979 | -1.425 | 611.20,303.05,285.04,257.04,229.05,201.05,129.05,97.03,85.03  | a |
| 52 | noricaraside_qt                   | 11.80 | C <sub>20</sub> H <sub>20</sub> O <sub>8</sub>  | P | 389.12320 | 389.12253 | -1.449 | 389.17,353.10,273.08,255.07,177.05,165.05,151.04,107.05,95.05 | e |
| 53 | tetrahydropalmatine               | 11.87 | C <sub>21</sub> H <sub>25</sub> NO <sub>4</sub> | P | 356.18563 | 356.18539 | -0.687 | 356.19,341.16,192.10,177.08                                   | g |
| 54 | rustoside                         | 11.90 | C <sub>26</sub> H <sub>28</sub> O <sub>15</sub> | N | 579.13554 | 579.13550 | 1.819  | 579.13,285.04,255.07,153.02,135.01,119.05                     | f |
| 55 | dihydrodaidzein                   | 11.92 | C <sub>15</sub> H <sub>12</sub> O <sub>4</sub>  | P | 257.08083 | 257.08047 | -1.421 | 257.08,239.07,211.08,197.06,163.04,147.04,137.02,119.05,53.04 | f |
| 56 | neoliquiritin                     | 11.94 | C <sub>21</sub> H <sub>22</sub> O <sub>9</sub>  | N | 417.11910 | 417.11926 | 3.000  | 417.12,255.07,153.02,135.01,119.05                            | c |
| 57 | rutin*                            | 11.95 | C <sub>27</sub> H <sub>30</sub> O <sub>16</sub> | N | 609.14610 | 609.14636 | 2.214  | 609.15,300.03,271.03,255.03                                   | f |
| 58 | calycosin 7-O-glucoside*          | 12.03 | C <sub>22</sub> H <sub>22</sub> O <sub>10</sub> | P | 447.12857 | 447.12781 | -1.707 | 447.13,285.08,270.05,253.05,225.05,197.06,137.02              | f |
| 59 | ethyl gallate                     | 12.05 | C <sub>9</sub> H <sub>10</sub> O <sub>5</sub>   | P | 199.06010 | 199.05981 | -1.456 | 199.06,169.01,125.02                                          | a |
| 60 | noroxyhydrastinine                | 12.07 | C <sub>10</sub> H <sub>9</sub> NO <sub>3</sub>  | P | 192.06551 | 192.06531 | -1.092 | 192.07,174.05,164.07,148.08,134.06,118.07,106.07,91.05        | g |
| 61 | hirsutrin                         | 12.12 | C <sub>21</sub> H <sub>20</sub> O <sub>12</sub> | N | 463.08819 | 463.08859 | 3.212  | 463.09,300.03,271.02,255.07,243.03,179.00,151.00,135.01,119.0 | f |

|    |                      |       |                                                 |   |           |           |        |                                                         |     |
|----|----------------------|-------|-------------------------------------------------|---|-----------|-----------|--------|---------------------------------------------------------|-----|
| 62 | quercetin*           | 12.13 | C <sub>15</sub> H <sub>10</sub> O <sub>7</sub>  | P | 303.04993 | 303.04974 | -0.624 | 303.05,285.04,257.04,229.05,201.05,153.02,137.02        | b,f |
| 63 | liquiritin*          | 12.18 | C <sub>21</sub> H <sub>22</sub> O <sub>9</sub>  | N | 417.11910 | 417.11917 | 2.784  | 417.12,255.07,135.01,119.05                             | c   |
| 64 | liquiritigenin*      | 12.19 | C <sub>15</sub> H <sub>12</sub> O <sub>4</sub>  | P | 257.08083 | 257.08054 | -1.149 | 257.08,239.07,211.08,197.06,163.04,147.04,137.02,119.05 | c   |
| 65 | licuraside           | 12.23 | C <sub>26</sub> H <sub>30</sub> O <sub>13</sub> | P | 551.17591 | 551.17511 | -1.465 | 551.17,419.13,257.08,239.07,211.08,147.04,137.02        | c   |
| 66 | hyperin*             | 12.25 | C <sub>21</sub> H <sub>20</sub> O <sub>12</sub> | N | 463.08819 | 463.08850 | 3.018  | 463.09,301.04,271.03,255.03,227.04,151.00,121.03        | b,f |
| 67 | lonicerin            | 12.29 | C <sub>27</sub> H <sub>30</sub> O <sub>15</sub> | P | 595.16574 | 595.16449 | -2.111 | 595.16,449.11,287.05,153.02,135.04                      | b   |
| 68 | isoquercitrin*       | 12.36 | C <sub>21</sub> H <sub>20</sub> O <sub>12</sub> | P | 465.10275 | 465.10260 | -0.328 | 465.10,303.05,285.04,257.04,229.05,137.02,85.03         | b,f |
| 69 | paeoniflorogenone    | 12.46 | C <sub>17</sub> H <sub>18</sub> O <sub>6</sub>  | P | 319.11761 | 319.11734 | -0.861 | 319.12,301.11,197.08,105.03                             | a   |
| 70 | gancaonin V          | 12.56 | C <sub>19</sub> H <sub>20</sub> O <sub>4</sub>  | P | 313.14344 | 331.15341 | -1.783 | 313.14,281.12,249.09,189.09,151.08,137.06,119.05,91.05  | c   |
| 71 | baicalin*            | 12.60 | C <sub>21</sub> H <sub>18</sub> O <sub>11</sub> | P | 447.09230 | 447.09143 | -1.695 | 447.09,446.21,271.06,169.01                             | a   |
| 72 | cynaroside*          | 12.60 | C <sub>21</sub> H <sub>20</sub> O <sub>11</sub> | P | 449.10783 | 449.10703 | -1.799 | 449.10,287.05,269.04,241.05,153.02,135.04,85.03         | b   |
| 73 | galloylpaeoniflorin* | 12.74 | C <sub>30</sub> H <sub>32</sub> O <sub>15</sub> | P | 633.18139 | 633.17969 | -2.695 | 633.14,315.07,197.08,171.03,153.02,105.03               | a   |
| 74 | vicenin-2            | 12.75 | C <sub>27</sub> H <sub>30</sub> O <sub>15</sub> | P | 595.16574 | 595.16473 | -1.708 | 595.16,449.11,287.05,153.02,135.04                      | c   |

|    |                                 |       |                                                              |   |           |           |        |                                                               |       |
|----|---------------------------------|-------|--------------------------------------------------------------|---|-----------|-----------|--------|---------------------------------------------------------------|-------|
| 75 | phenylalanine                   | 12.82 | C <sub>9</sub> H <sub>11</sub> NO <sub>2</sub>               | P | 166.08625 | 166.08626 | 0.029  | 166.08,120.08,108.04,80.05                                    | h/k/l |
| 76 | amurensin                       | 12.92 | C <sub>26</sub> H <sub>30</sub> O <sub>12</sub>              | N | 533.16644 | 533.16644 | 2.039  | 534.16,283.06,268.04                                          | g     |
| 77 | magnoflorine*                   | 12.94 | C <sub>20</sub> H <sub>24</sub> NO <sub>4</sub> <sup>+</sup> | P | 342.16998 | 342.16916 | -2.410 | 342.17,297.11,192.10,177.08,149.08                            | g     |
| 78 | nicotiflorin                    | 13.15 | C <sub>27</sub> H <sub>30</sub> O <sub>15</sub>              | P | 595.16574 | 595.16473 | -1.708 | 595.16,449.11,287.05,153.02,135.04                            | c     |
| 79 | tetrahydroxydi<br>hydrochalcone | 13.30 | C <sub>15</sub> H <sub>14</sub> O <sub>5</sub>               | N | 273.07684 | 273.07690 | 4.211  | 273.08,211.08,199.08,183.08,169.06,157.07,147.05,117.07,85.03 | c     |
| 80 | narcissoside                    | 13.42 | C <sub>28</sub> H <sub>32</sub> O <sub>16</sub>              | N | 623.16175 | 623.16119 | 0.849  | 623.16,315.05,299.02,271.05,255.03                            | c     |
| 81 | cynarin                         | 13.43 | C <sub>25</sub> H <sub>24</sub> O <sub>12</sub>              | P | 517.13405 | 517.13287 | -2.287 | 517.13,499.12,337.09,319.08,163.04,135.04,117.03              | b     |
| 82 | prunetin                        | 13.52 | C <sub>16</sub> H <sub>12</sub> O <sub>5</sub>               | N | 283.06119 | 283.061   | 3.180  | 283.06,268.04,239.04,211.04                                   | c     |
| 83 | astragalin*                     | 13.57 | C <sub>21</sub> H <sub>20</sub> O <sub>11</sub>              | P | 449.10783 | 449.10663 | -2.689 | 449.10,287.05,269.04,241.05,153.02,135.04,85.03               | b     |
| 84 | listrocol                       | 13.62 | C <sub>25</sub> H <sub>24</sub> O <sub>12</sub>              | P | 517.13405 | 517.13306 | -1.919 | 517.13,499.12,337.09,319.08,163.04,135.04,117.03              | b     |
| 85 | cavidine<br>4-O-                | 13.68 | C <sub>21</sub> H <sub>23</sub> NO <sub>4</sub>              | P | 354.16998 | 354.16937 | -1.736 | 354.17,338.10,190.09,149.06                                   | g     |
| 86 | galloylalbiflori<br>n           | 13.92 | C <sub>30</sub> H <sub>32</sub> O <sub>15</sub>              | P | 633.18151 | 633.18042 | -1.542 | 633.18,315.07,197.08,171.03,153.02,105.03                     | a     |
| 87 | rhoifolin*                      | 13.96 | C <sub>27</sub> H <sub>30</sub> O <sub>14</sub>              | P | 579.17083 | 579.16992 | -1.575 | 579.17,539.12,433.11,271.06,225.05,153.02,119.05              | b     |
| 88 | acteoside*                      | 13.96 | C <sub>29</sub> H <sub>36</sub> O <sub>15</sub>              | N | 623.19814 | 623.16138 | 1.154  | 623.20,461.17,161.02                                          | d     |
| 89 | naringenin                      | 14.00 | C <sub>15</sub> H <sub>12</sub> O <sub>5</sub>               | P | 273.07575 | 273.07516 | -2.161 | 273.08,255.06,171.03,153.02,147.04,119.05                     | c     |

|     |                                |       |                                                  |   |           |           |        |                                                                              |   |
|-----|--------------------------------|-------|--------------------------------------------------|---|-----------|-----------|--------|------------------------------------------------------------------------------|---|
| 90  | vitexin                        | 14.03 | C <sub>21</sub> H <sub>20</sub> O <sub>10</sub>  | N | 431.09837 | 431.09796 | 1.593  | 431.10,268.04,239.04,211.04,12<br>1.03                                       | c |
| 91  | cosmetin*                      | 14.04 | C <sub>21</sub> H <sub>20</sub> O <sub>10</sub>  | P | 433.11292 | 433.11139 | -3.540 | 433.11,271.06,225.05,153.02,11<br>9.05,85.03                                 | b |
| 92  | menisporphine                  | 14.36 | C <sub>19</sub> H <sub>15</sub> NO <sub>4</sub>  | P | 322.10738 | 322.10706 | -1.007 | 322.11,307.08,292.06,279.09,25<br>1.09                                       | f |
| 93  | isochlorogenic<br>acid B       | 14.43 | C <sub>25</sub> H <sub>24</sub> O <sub>12</sub>  | P | 517.13405 | 517.13300 | -2.035 | 517.13,499.12,337.09,319.08,16<br>3.04,135.04,117.03                         | b |
| 94  | hesperidin*                    | 14.45 | C <sub>28</sub> H <sub>34</sub> O <sub>15</sub>  | P | 611.19705 | 611.19550 | -2.531 | 611.20,449.14,413.12,303.09,26<br>3.05,195.03,177.05,153.02,135.0<br>4,85.03 | f |
| 95  | nonanedioic<br>acid            | 14.46 | C <sub>9</sub> H <sub>16</sub> O <sub>4</sub>    | N | 187.09758 | 187.09737 | 4.728  | 187.10,169.09,125.10<br>461.11,299.06-                                       | e |
| 96  | rhamnocitrin-<br>3-O-glucoside | 14.47 | C <sub>22</sub> H <sub>22</sub> O <sub>11</sub>  | N | 461.10893 | 461.10864 | 1.740  | ,284.03,271.06,255.03,165.02,13<br>3.03                                      | f |
| 97  | canadine                       | 14.53 | C <sub>20</sub> H <sub>21</sub> NO <sub>4</sub>  | N | 338.13978 | 338.13971 | 3.032  | 338.14,323.12,308.09,293.07                                                  | g |
| 98  | albiflorin*                    | 14.72 | C <sub>23</sub> H <sub>28</sub> O <sub>11</sub>  | P | 481.17043 | 481.16907 | -2.843 | 481.17,319.12,301.11,197.08,17<br>9.07,151.08,133.06,105.03                  | a |
| 99  | isochlorogenic<br>acid A       | 14.80 | C <sub>25</sub> H <sub>24</sub> O <sub>12</sub>  | P | 517.13405 | 517.13220 | -3.582 | 517.13,499.12,337.09,319.08,16<br>3.04,135.04,117.03                         | b |
| 100 | corydaline                     | 14.88 | C <sub>22</sub> H <sub>27</sub> O <sub>4</sub> N | P | 370.20139 | 370.20062 | -1.796 | 370.20,206.12,190.09<br>611.20,449.14,413.12,303.09,26                       | g |
| 101 | neohesperidin                  | 14.90 | C <sub>28</sub> H <sub>34</sub> O <sub>15</sub>  | P | 611.19705 | 611.19598 | -1.745 | 3.05,195.03,177.05,153.02,135.0<br>4,85.03                                   | f |
| 102 | albiflorin                     | 15.00 | C <sub>23</sub> H <sub>28</sub> O <sub>11</sub>  | P | 481.17043 | 481.17004 | -0.827 | 481.17,319.12,301.11,197.08,17                                               | a |



|     |                                           |       |                                                 |   |           |           |        |                                                                |     |
|-----|-------------------------------------------|-------|-------------------------------------------------|---|-----------|-----------|--------|----------------------------------------------------------------|-----|
|     | isomer                                    |       |                                                 |   |           |           |        | 9.07,151.08,133.06,105.03                                      |     |
| 103 | pinocembrin                               | 15.20 | C <sub>15</sub> H <sub>12</sub> O <sub>4</sub>  | P | 257.08083 | 257.08051 | -1.266 | 257.08,239.07,211.08,197.06,163.04,147.04,137.02,119.05        | c   |
| 104 | liquiritin apioside                       | 15.23 | C <sub>26</sub> H <sub>30</sub> O <sub>13</sub> | P | 551.17591 | 551.17548 | -0.793 | 551.17,419.13,257.08,239.07,211.08,147.04,137.02               | c   |
| 105 | paeonin c                                 | 15.42 | C <sub>17</sub> H <sub>24</sub> O <sub>9</sub>  | N | 371.13354 | 371.13452 | 2.321  | 371.14,191.07,69.03,59.01                                      | a   |
| 106 | 7,4'-dihydroxyflavone                     | 15.44 | C <sub>15</sub> H <sub>10</sub> O <sub>4</sub>  | P | 255.06518 | 255.06444 | -2.922 | 255.06,237.05,227.07,199.07,207.10,189.09,179.11,171.08,163.04 | c   |
| 107 | 2-valerylbenzoic acid                     | 15.46 | C <sub>12</sub> H <sub>14</sub> O <sub>3</sub>  | P | 207.10157 | 207.10109 | -2.322 | 1.10,147.08,133.06,123.04,105.07,91.05                         | e   |
| 108 | 3,4-di-O-caffeoylquinic acid methyl ester | 15.46 | C <sub>26</sub> H <sub>26</sub> O <sub>12</sub> | P | 531.14970 | 531.14758 | -3.996 | 513.14,163.04,145.03                                           | b   |
| 109 | glycyroside                               | 15.55 | C <sub>27</sub> H <sub>30</sub> O <sub>13</sub> | P | 563.17591 | 563.17474 | -2.091 | 563.06,269.08,213.09,163.04                                    | c   |
| 110 | camphoric acid                            | 15.83 | C <sub>10</sub> H <sub>16</sub> O <sub>4</sub>  | N | 199.09758 | 199.09743 | 4.744  | 199.10,183.02,155.11                                           | e   |
| 111 | isoformononetin                           | 15.99 | C <sub>16</sub> H <sub>12</sub> O <sub>4</sub>  | N | 267.06628 | 267.06561 | 1.590  | 267.07,252.04,195.05,132.02                                    | c,f |
| 112 | ononin*                                   | 15.99 | C <sub>22</sub> H <sub>22</sub> O <sub>9</sub>  | P | 431.13365 | 431.13199 | -3.870 | 431.13,269.08,254.06,213.09,197.06,154.03,107.05               | c,f |
| 113 | daidzein*                                 | 16.09 | C <sub>15</sub> H <sub>10</sub> O <sub>4</sub>  | P | 255.06518 | 255.06561 | 1.665  | 255.06,237.05,227.07,199.07                                    | f   |
| 114 | wogonin*                                  | 16.12 | C <sub>16</sub> H <sub>12</sub> O <sub>5</sub>  | N | 283.06119 | 283.06082 | 2.544  | 283.06,268.04,239.04,211.04                                    | i   |
| 115 | licochalcone B*                           | 16.13 | C <sub>16</sub> H <sub>14</sub> O <sub>5</sub>  | P | 287.09140 | 287.09052 | -3.065 | 287.09,269.08,255.10,245.08,193.05,147.04,139.04,121.03        | c   |

|     |                                                                     |       |                                                 |   |           |            |        |                                                                              |   |
|-----|---------------------------------------------------------------------|-------|-------------------------------------------------|---|-----------|------------|--------|------------------------------------------------------------------------------|---|
| 116 | kaempferol                                                          | 16.25 | C <sub>15</sub> H <sub>10</sub> O <sub>6</sub>  | P | 287.05501 | 287.05429  | -2.524 | 287.05,269.04,241.05,151.04,12<br>1.03,107.05                                | b |
| 117 | lactinolide                                                         | 16.32 | C <sub>10</sub> H <sub>16</sub> O <sub>4</sub>  | N | 199.09758 | 199.09744  | 4.794  | 199.10,155.11,137.10                                                         | a |
| 118 | caffeoylquinic<br>acid methyl<br>ester                              | 16.33 | C <sub>26</sub> H <sub>26</sub> O <sub>12</sub> | N | 529.13515 | 529.13489  | 1.583  | 529.13,434.04,367.10,353.09,19<br>1.06,179.03,173.05,161.02,135.0<br>5,93.03 | b |
| 119 | isoliquiritigeni<br>n                                               | 16.38 | C <sub>15</sub> H <sub>12</sub> O <sub>4</sub>  | P | 257.08083 | 257.08066  | -0.682 | 257.08,239.07,211.08,197.06,16<br>3.04,147.04,137.02,119.05,53.05            | c |
| 120 | gancaonin C                                                         | 16.74 | C <sub>20</sub> H <sub>18</sub> O <sub>6</sub>  | N | 353.10306 | 353.10294  | 2.762  | 353.10,338.08,323.06,279.07,25<br>1.07,191.06                                | c |
| 121 | luteolin*                                                           | 17.03 | C <sub>15</sub> H <sub>10</sub> O <sub>6</sub>  | P | 287.05501 | 287.05438  | -2.210 | 287.05,269.04,229.12,153.02,13<br>7.02,81.03                                 | b |
| 122 | phellopterin                                                        | 17.03 | C <sub>17</sub> H <sub>16</sub> O <sub>5</sub>  | P | 301.10705 | 301.10648  | -1.893 | 301.11,286.08,269.08,241.09,16<br>7.07,152.05                                | g |
| 123 | calycosin*                                                          | 17.19 | C <sub>16</sub> H <sub>12</sub> O <sub>5</sub>  | N | 283.06119 | 283.06097  | 3.074  | 283.06,268.04,239.04,211.04                                                  | c |
| 124 | sebacic acid                                                        | 17.22 | C <sub>10</sub> H <sub>18</sub> O <sub>4</sub>  | N | 201.11323 | 201.11299  | 4.249  | 201.11,183.10,139.11,116.93                                                  | e |
| 125 | cistanoside D                                                       | 17.22 | C <sub>31</sub> H <sub>40</sub> O <sub>15</sub> | N | 651.22944 | 651.22858  | 0.358  | 651.23,193.05,175.04,160.02                                                  | d |
| 126 | 1-O-beta-d-<br>glucopyranosyl<br>-8-O-<br>benzoylpaeoni<br>suffrone | 17.63 | C <sub>23</sub> H <sub>28</sub> O <sub>10</sub> | P | 465.17563 | 465.17462  | -1.942 | 465.17,167.07,123.04                                                         | a |
| 127 | butyl benzoate                                                      | 17.93 | C <sub>11</sub> H <sub>14</sub> O <sub>2</sub>  | N | 177.09210 | 177.091810 | 0.804  | 177.09,133.03,121.03,101.06,93.<br>03                                        | c |
| 128 | senkyunolide                                                        | 17.93 | C <sub>12</sub> H <sub>14</sub> O <sub>4</sub>  | N | 221.08193 | 221.08173  | 4.047  | 221.08,177.09,159.08,95.03                                                   | e |

| D   |                                |       |                                                 |   |           |           |        |                                                      |     |
|-----|--------------------------------|-------|-------------------------------------------------|---|-----------|-----------|--------|------------------------------------------------------|-----|
| 129 | ethyl caffeate*                | 18.00 | C <sub>11</sub> H <sub>12</sub> O <sub>4</sub>  | N | 207.06628 | 207.06587 | 3.307  | 207.07,179.03,161.02,135.04,133.03                   | b,e |
| 130 | cinnamic acid*                 | 18.02 | C <sub>9</sub> H <sub>8</sub> O <sub>2</sub>    | P | 149.05970 | 149.05942 | -1.919 | 149.06,131.05,121.06,103.05,95.05,93.07,91.05,77.04  | d   |
| 131 | paeonol                        | 18.02 | C <sub>9</sub> H <sub>10</sub> O <sub>3</sub>   | P | 167.07027 | 167.06989 | -2.279 | 167.07,149.06,121.06,93.07,91.05                     | a   |
| 132 | aucubin*                       | 18.03 | C <sub>15</sub> H <sub>22</sub> O <sub>9</sub>  | N | 345.11910 | 345.11877 | 2.206  | 345.12,183.07,165.06,121.06,101.02,89.02,71.01,59.01 | d   |
| 133 | harpagoside*                   | 18.03 | C <sub>24</sub> H <sub>30</sub> O <sub>11</sub> | N | 493.17153 | 493.17111 | 1.362  | 493.17,447.22,165.06,147.04                          | d   |
| 134 | wogonoside                     | 18.74 | C <sub>22</sub> H <sub>20</sub> O <sub>11</sub> | P | 461.10783 | 461.10696 | -1.904 | 461.10,285.08,270.05,257.08,239.07,186.02,168.00     | i   |
| 135 | apigenin*                      | 18.93 | C <sub>15</sub> H <sub>10</sub> O <sub>5</sub>  | P | 271.06010 | 271.05954 | -2.066 | 271.06,254.19,226.15,180.07,161.02,137.02            | b   |
| 136 | senkyunolide*                  | 19.06 | C <sub>12</sub> H <sub>16</sub> O <sub>2</sub>  | P | 193.12230 | 193.12224 | -0.343 | 193.12,175.11,147.12,137.06,                         | e   |
| 137 | ammidin                        | 19.09 | C <sub>16</sub> H <sub>14</sub> O <sub>4</sub>  | P | 271.09660 | 271.09604 | -1.643 | 271.10,137.06,121.03,107.05                          | e   |
| 138 | baicalein*                     | 19.11 | C <sub>15</sub> H <sub>10</sub> O <sub>5</sub>  | P | 271.06010 | 271.05954 | -2.066 | 271.06,243.07,153.02,121.03,107.05                   | a   |
| 139 | astraisoflavan glucoside       | 19.18 | C <sub>23</sub> H <sub>24</sub> O <sub>11</sub> | P | 477.13913 | 477.13837 | -1.609 | 477.14,315.09,300.06,272.06                          | f   |
| 140 | skimmianin*                    | 19.41 | C <sub>14</sub> H <sub>13</sub> NO <sub>4</sub> | P | 260.09173 | 260.09146 | -1.055 | 260.09,245.07,230.04,227.06,216.07,199.06,184.04     | g   |
| 141 | chryseriol                     | 19.54 | C <sub>16</sub> H <sub>12</sub> O <sub>6</sub>  | N | 299.05611 | 299.05569 | 2.259  | 299.06,284.03,256.04                                 | b   |
| 142 | 9(11)-dehydroglycyrrhetic acid | 19.49 | C <sub>30</sub> H <sub>46</sub> O <sub>3</sub>  | P | 455.35208 | 455.35117 | -1.761 | 455.35,437.34,419.33,297.22,143.11                   | c   |

|     |                          |       |                                                 |   |           |           |        |                                                                          |   |
|-----|--------------------------|-------|-------------------------------------------------|---|-----------|-----------|--------|--------------------------------------------------------------------------|---|
| 143 | prosapogenin             | 19.52 | C <sub>36</sub> H <sub>58</sub> O <sub>8</sub>  | P | 619.42044 | 619.41901 | -2.317 | 619.42,455.35,437.34,409.34,20<br>3.18,201.16,189.16,85.03,71.05         | c |
| 144 | helixin                  | 19.54 | C <sub>41</sub> H <sub>66</sub> O <sub>12</sub> | P | 751.46270 | 751.46075 | -2.600 | 751.46,455.35,437.34,409.35,27<br>9.11,85.03,71.05                       | c |
| 145 | isoflavanone             | 19.55 | C <sub>17</sub> H <sub>16</sub> O <sub>6</sub>  | N | 315.08741 | 315.08713 | 2.588  | 315.09,285.04,178.03,109.03                                              | f |
| 146 | benzoyl<br>paeoniflorin* | 19.63 | C <sub>30</sub> H <sub>32</sub> O <sub>12</sub> | P | 585.19676 | 585.19562 | -1.765 | 585.20,319.12,105.03                                                     | a |
| 147 | hederagenol              | 19.88 | C <sub>30</sub> H <sub>48</sub> O <sub>4</sub>  | P | 473.36253 | 473.36139 | -2.422 | 473.36,437.34,419.33,297.22,14<br>3.11,123.12,                           | c |
| 148 | cauloside A              | 19.88 | C <sub>35</sub> H <sub>56</sub> O <sub>8</sub>  | P | 605.40479 | 605.40338 | -2.337 | 605.40,587.39,473.36,455.35,43<br>7.34,419.33,                           | c |
| 149 | N <sub>1</sub>           | 19.90 | C <sub>47</sub> H <sub>76</sub> O <sub>17</sub> | P | 913.51553 | 913.51361 | -2.099 | 913.51,455.35,437.34,409.35,39<br>1.34,309.12,279.11                     | c |
| 150 | isorhamnetin*            | 19.97 | C <sub>16</sub> H <sub>12</sub> O <sub>7</sub>  | N | 315.05102 | 315.05023 | 0.955  | 315.05,300.03,109.03                                                     | f |
| 151 | fagarine                 | 19.99 | C <sub>13</sub> H <sub>11</sub> NO <sub>3</sub> | P | 230.08116 | 230.08092 | -1.086 | 230.08,215.06,200.03,186.05,17<br>2.04                                   | g |
| 152 | rhamnocitrin             | 20.00 | C <sub>16</sub> H <sub>12</sub> O <sub>6</sub>  | N | 299.05611 | 299.05600 | 3.295  | 299.06,284.03,256.04                                                     | f |
| 153 | N <sub>2</sub>           | 20.09 | C <sub>48</sub> H <sub>72</sub> O <sub>21</sub> | P | 985.46389 | 985.46173 | -2.187 | 985.46,615.39,471.35,453.34,43<br>5.32,407.33                            | c |
| 154 | dictamine                | 21.47 | C <sub>12</sub> H <sub>9</sub> NO <sub>2</sub>  | P | 200.07060 | 200.07034 | -1.325 | 200.07,185.05,129.05,73.04                                               | g |
| 155 | ethyl ferulate*          | 21.57 | C <sub>12</sub> H <sub>14</sub> O <sub>5</sub>  | P | 223.09648 | 223.09615 | -1.504 | 223.10,177.05,149.06,145.03,11<br>7.03                                   | e |
| 156 | sedanolide               | 21.61 | C <sub>12</sub> H <sub>18</sub> O <sub>2</sub>  | P | 195.13795 | 195.13773 | -1.160 | 195.14,177.13,149.13,123.12,10<br>7.09,93.07,81.07,69.07,67.05,55.<br>05 | e |
| 157 | butylidenephth           | 21.73 | C <sub>12</sub> H <sub>12</sub> O <sub>2</sub>  | P | 189.09100 | 189.09067 | -1.778 | 189.09,171.08,161.10,147.04,14                                           | e |

| alide* |                                |       |                                                 |   |           |           |        |                                                                | 3.09,133.03,105.03,95.05 |  |
|--------|--------------------------------|-------|-------------------------------------------------|---|-----------|-----------|--------|----------------------------------------------------------------|--------------------------|--|
| 158    | formononetin *                 | 21.77 | C <sub>16</sub> H <sub>12</sub> O <sub>4</sub>  | P | 269.08083 | 269.08038 | -1.692 | 269.08,254.06,237.05,213.09,197.06                             | g                        |  |
| 159    | apigenin 7,4'-dimethyl ether   | 22.26 | C <sub>17</sub> H <sub>14</sub> O <sub>5</sub>  | P | 299.09140 | 299.09100 | -1.338 | 299.09,284.07,267.07,256.07,184.04                             | b                        |  |
| 160    | ilekudinoside D                | 22.39 | C <sub>41</sub> H <sub>66</sub> O <sub>14</sub> | P | 783.45253 | 783.45105 | -1.893 | 783.45,603.08,585.38,453.34,435.33,245.15,201.16               | c                        |  |
| 161    | amurensin_qt                   | 22.60 | C <sub>20</sub> H <sub>20</sub> O <sub>7</sub>  | P | 373.12817 | 373.12747 | -1.901 | 373.16,355.12,299.05,165.02                                    | g                        |  |
| 162    | saikogenin F                   | 22.61 | C <sub>30</sub> H <sub>48</sub> O <sub>4</sub>  | P | 473.36253 | 473.36145 | -2.295 | 473.36,437.34,419.33,297.22,143.11,123.12                      | b                        |  |
| 163    | astragaloside A*               | 22.61 | C <sub>41</sub> H <sub>68</sub> O <sub>14</sub> | P | 785.46818 | 785.46637 | -2.308 | 785.47,473.36,455.35,437.34,143.11,125.10,71.05                | f                        |  |
| 164    | O-glucopyranosyl epiederagenin | 22.61 | C <sub>36</sub> H <sub>58</sub> O <sub>9</sub>  | P | 635.41536 | 635.41382 | -2.423 | 635.41,455.35,437.34,419.33,297.22,143.11,107.09,71.05         | c                        |  |
| 165    | N <sub>3</sub>                 | 22.61 | C <sub>41</sub> H <sub>66</sub> O <sub>13</sub> | P | 767.45762 | 767.45563 | -2.591 | 767.46,587.39,569.38,473.36,455.35,437.34,419.33,143.11,125.10 | f                        |  |
| 166    | glypallidifloric acid          | 22.93 | C <sub>30</sub> H <sub>46</sub> O <sub>3</sub>  | P | 455.35208 | 455.35120 | -1.695 | 455.35,437.34,419.33,297.22,143.11                             | c                        |  |
| 167    | castanin                       | 23.59 | C <sub>17</sub> H <sub>14</sub> O <sub>5</sub>  | P | 299.09140 | 299.09079 | -2.040 | 299.09,283.06,266.06,255.07,238.06,210.07,196.05,147.04,134.04 | c                        |  |
| 168    | licoricesaponin G2             | 23.81 | C <sub>42</sub> H <sub>62</sub> O <sub>17</sub> | P | 839.40598 | 839.40436 | -1.926 | 839.41,487.34,469.33,451.32,                                   | c                        |  |
| 169    | isoimperatorin                 | 23.94 | C <sub>16</sub> H <sub>14</sub> O <sub>4</sub>  | P | 271.09660 | 271.09616 | -1.200 | 271.10,147.04,137.06,123.04,10                                 | e                        |  |

|     |                                                       |       |                                                 |   |           |           |        |                                                                                    |      |   |
|-----|-------------------------------------------------------|-------|-------------------------------------------------|---|-----------|-----------|--------|------------------------------------------------------------------------------------|------|---|
| 170 | astragaloside<br>II*                                  | 24.18 | C <sub>43</sub> H <sub>70</sub> O <sub>15</sub> | P | 827.47874 | 827.47699 | -2.124 | 827.47,629.41,473.36,437.34,29<br>7.22,175.06,143.11,125.10                        | 9.06 | f |
| 171 | senkyunolide<br>B                                     | 24.20 | C <sub>12</sub> H <sub>12</sub> O <sub>3</sub>  | N | 203.07136 | 203.07120 | 4.576  | 203.07,174.03,160.02                                                               |      | b |
| 172 | lucyoside Q                                           | 24.23 | C <sub>36</sub> H <sub>58</sub> O <sub>9</sub>  | P | 635.41536 | 635.41388 | -2.329 | 635.41,455.35,437.34,419.33,31<br>5.23,297.22,143.11,125.10,107.0<br>9,71.05       |      | c |
| 173 | isoastragalosid<br>e II                               | 24.36 | C <sub>43</sub> H <sub>70</sub> O <sub>15</sub> | P | 827.47875 | 827.47723 | -1.834 | 827.47,455.35,437.34,419.33,17<br>5.06,157.05,143.11,125.10,115.0<br>4,97.03,85.03 |      | f |
| 174 | glycyrrhizic<br>acid*                                 | 25.14 | C <sub>42</sub> H <sub>62</sub> O <sub>16</sub> | P | 823.41106 | 823.40961 | -1.764 | 823.41,647.38,471.35,453.34,43<br>5.32                                             |      | c |
| 175 | soyasaponin I                                         | 25.19 | C <sub>48</sub> H <sub>78</sub> O <sub>18</sub> | P | 943.52609 | 943.52362 | -2.620 | 943.52,599.39,441.37,405.35,30<br>5.09,229.19,203.18,141.02,85.03                  |      | c |
| 176 | saikogenin A                                          | 25.24 | C <sub>30</sub> H <sub>48</sub> O <sub>4</sub>  | P | 473.36253 | 473.36176 | -1.640 | 473.36,437.34,419.33,297.22,14<br>3.11,123.12                                      |      | b |
| 177 | 3-butylidene-<br>7-hydroxy-2-<br>benzofuran-1-<br>one | 25.35 | C <sub>12</sub> H <sub>12</sub> O <sub>3</sub>  | N | 203.07136 | 203.07124 | 4.773  | 203.07,174.03,160.02                                                               |      | e |
| 178 | glepidotin A                                          | 25.46 | C <sub>20</sub> H <sub>18</sub> O <sub>5</sub>  | N | 337.10814 | 337.10788 | 2.462  | 337.11,293.05,282.05,253.05                                                        |      | c |
| 179 | 3-(3,4-<br>dihydroxyphen<br>yl)-5,7-<br>dihydroxy-8-  | 25.79 | C <sub>20</sub> H <sub>18</sub> O <sub>6</sub>  | N | 353.10306 | 353.10284 | 2.479  | 353.10,175.04,133.03                                                               |      | c |

|     |                               |       |                                                 |   |           |           |        |                                                                                          |   |
|-----|-------------------------------|-------|-------------------------------------------------|---|-----------|-----------|--------|------------------------------------------------------------------------------------------|---|
|     | (3-methylbut-2-enyl)-chromone |       |                                                 |   |           |           |        |                                                                                          |   |
| 180 | licoflavonol*                 | 26.15 | C <sub>20</sub> H <sub>18</sub> O <sub>6</sub>  | N | 353.10306 | 351.08694 | 1.781  | 353.10,149.02,136.02,133.03                                                              | c |
| 181 | licoarylcoumarin              | 26.19 | C <sub>21</sub> H <sub>20</sub> O <sub>6</sub>  | N | 367.11871 | 367.11832 | 1.921  | 367.12,352.09,337.07-,309.04,                                                            | c |
| 182 | mimugenone                    | 26.19 | C <sub>30</sub> H <sub>46</sub> O <sub>3</sub>  | P | 455.35208 | 455.35104 | -2.046 | 455.35,437.34,419.33,297.22,143.11                                                       | c |
| 183 | calendulose E methyl ester    | 26.19 | C <sub>37</sub> H <sub>58</sub> O <sub>9</sub>  | P | 647.41536 | 647.41370 | -2.564 | 647.41,455.35,453.33,437.34,419.33,297.22,279.21,143.11,141.13,123.12,115.04,97.03,85.03 | c |
| 184 | N <sub>4</sub>                | 26.21 | C <sub>43</sub> H <sub>68</sub> O <sub>14</sub> | P | 809.46818 | 809.46613 | -2.536 | 809.47,599.39,455.35,439.36,437.34,419.33,143.11,125.10                                  | f |
| 185 | atractylenolide III*          | 26.39 | C <sub>15</sub> H <sub>20</sub> O <sub>3</sub>  | P | 249.14852 | 249.14813 | -1.569 | 249.15,231.14,213.13,207.10,189.09,119.09,105.07                                         | i |
| 186 | glepidotin B                  | 26.48 | C <sub>20</sub> H <sub>20</sub> O <sub>5</sub>  | N | 339.12379 | 339.12344 | 2.182  | 339.12,167.03,109.03                                                                     | c |
| 187 | butylphthalide*               | 26.65 | C <sub>12</sub> H <sub>14</sub> O <sub>2</sub>  | P | 191.10665 | 191.10645 | -1.079 | 191.11,173.10,163.11,149.06,145.10,117.07,91.05                                          | e |
| 188 | 6-prenylluteolin              | 26.66 | C <sub>20</sub> H <sub>18</sub> O <sub>6</sub>  | N | 353.10306 | 353.10269 | 2.054  | 353.10,219.07,179.03,133.07                                                              | c |
| 189 | isolicoflavonol               | 27.04 | C <sub>20</sub> H <sub>18</sub> O <sub>6</sub>  | N | 353.10306 | 353.10257 | 1.714  | 353.10,297.04,269.04,191.06                                                              | c |
| 190 | licoisoflavone                | 27.71 | C <sub>20</sub> H <sub>18</sub> O <sub>6</sub>  | N | 353.10306 | 353.10275 | 2.224  | 353.10,284.03,177.09,125.02                                                              | c |
| 191 | 2-linoleoylglycerol           | 27.95 | C <sub>21</sub> H <sub>38</sub> O <sub>4</sub>  | P | 355.28440 | 355.28336 | -2.607 | 355.28,337.27,263.24,245.23,121.10,95.09,81.07,67.05                                     | j |
| 192 | luteolin-7,3',4'-             | 28.32 | C <sub>18</sub> H <sub>16</sub> O <sub>6</sub>  | P | 329.10196 | 329.10144 | -1.594 | 329.10,313.07,300.06,285.08,25                                                           | b |

|     |                                            |       |                                                 |   |           |           |        |                                                                              |   |
|-----|--------------------------------------------|-------|-------------------------------------------------|---|-----------|-----------|--------|------------------------------------------------------------------------------|---|
|     | trimethylether*                            |       |                                                 |   |           |           |        | 6.07                                                                         |   |
| 193 | astragaloside I*                           | 28.35 | C <sub>45</sub> H <sub>72</sub> O <sub>16</sub> | P | 869.48931 | 869.48761 | -1.958 | 869.49,653.40,455.35,437.34,40<br>1.32,297.22,217.07,143.11                  | f |
| 194 | gonzalitasin I                             | 28.42 | C <sub>18</sub> H <sub>16</sub> O <sub>6</sub>  | P | 329.10196 | 329.10135 | -1.868 | 329,10,313.07,285.07,270.05,25<br>6.07,168.04,167.03                         | b |
| 195 | glycyrrhetyl<br>30-<br>monoglucuroni<br>de | 28.49 | C <sub>36</sub> H <sub>54</sub> O <sub>10</sub> | P | 647.37897 | 647.37823 | -1.150 | 647.38,453.34,435.32,285.22,21<br>7.16,107.09,95.09,85.03                    | c |
| 196 | ligustilide*                               | 29.01 | C <sub>12</sub> H <sub>14</sub> O <sub>2</sub>  | P | 191.10665 | 191.10646 | -1.027 | 191.11,173.10,163.11,149.06,14<br>5.10,117.07,91.05                          | e |
| 197 | kanzonols W                                | 29.23 | C <sub>20</sub> H <sub>16</sub> O <sub>5</sub>  | N | 335.09249 | 335.09241 | 3.014  | 335.09,291.10,185.08,127.08                                                  | c |
| 198 | glabridin*                                 | 29.72 | C <sub>20</sub> H <sub>20</sub> O <sub>4</sub>  | N | 323.12888 | 323.12869 | 2.799  | 323.13,201.09,135.04                                                         | c |
| 199 | 3β-<br>hydroxyatracty<br>lone              | 30.01 | C <sub>15</sub> H <sub>20</sub> O <sub>2</sub>  | P | 233.15360 | 233.15355 | -0.242 | 233.15,215.14,205.16,187.15,15<br>9.08,131.09,119.09,105.07                  | i |
| 200 | atractylenolide<br>II*                     | 30.46 | C <sub>15</sub> H <sub>20</sub> O <sub>2</sub>  | P | 233.15360 | 233.15346 | -0.628 | 233.15,215.14,187.15,177.09,15<br>9.08,151.08,131.09,117.07,105.0<br>7,95.09 | i |
| 201 | licoisoflavone<br>B*                       | 30.47 | C <sub>20</sub> H <sub>16</sub> O <sub>6</sub>  | N | 351.08741 | 351.08725 | 2.664  | 351.09,321.04,283.10,265.09,19<br>9.07,146.97                                | c |
| 202 | atractylenolide<br>I*                      | 33.30 | C <sub>15</sub> H <sub>18</sub> O <sub>2</sub>  | P | 231.13795 | 231.13780 | -0.677 | 231.14,213.13,203.14,175.08,16<br>3.08,161.06,149.06,135.04,105.0<br>7       | i |
| 203 | linolenic acid                             | 33.83 | C <sub>18</sub> H <sub>30</sub> O <sub>2</sub>  | P | 279.23185 | 279.23169 | -0.597 | 279.23,261.22,223.17,209.15,13<br>7.13,123.12,109.10,95.09,81.07,            | j |



|     |                         |       |                                                |   |           |           |        |                                                                     |   |
|-----|-------------------------|-------|------------------------------------------------|---|-----------|-----------|--------|---------------------------------------------------------------------|---|
| 204 | enoxolone*              | 35.27 | C <sub>30</sub> H <sub>46</sub> O <sub>4</sub> | P | 471.34688 | 471.34555 | -2.835 | 67.05<br>471.35,425.34,407.33,317.21,23<br>5.17,217.16,175.15,95.09 | c |
| 205 | gancaonin U             | 36.48 | C <sub>24</sub> H <sub>28</sub> O <sub>4</sub> | P | 381.20603 | 381.20535 | -1.799 | 381.21,363.19,335.20,297.11,27<br>9.14,191.11,173.10,135.04         | c |
| 206 | linoleic acid           | 43.73 | C <sub>18</sub> H <sub>32</sub> O <sub>2</sub> | N | 279.23295 | 279.23257 | 2.554  | 280.24,279.23,96.96                                                 | j |
| 207 | 9,12-<br>octadecadienal | 44.35 | C <sub>18</sub> H <sub>32</sub> O              | P | 265.25270 | 265.25229 | -1.139 | 265.25,247.24,149.13                                                | j |
| 208 | ethyl<br>linolenate     | 45.33 | C <sub>20</sub> H <sub>34</sub> O <sub>2</sub> | N | 305.24860 | 305.24835 | 2.762  | 305.25,105.07,95.09,93.07,69.07<br>,67.05                           | j |
| 209 | oleic acid              | 46.76 | C <sub>18</sub> H <sub>34</sub> O <sub>2</sub> | N | 281.24860 | 281.24835 | 2.998  | 281.25, 95.09,93.07,69.07,67.05                                     | j |
| 210 | mandenol                | 47.50 | C <sub>20</sub> H <sub>36</sub> O <sub>2</sub> | N | 307.26425 | 307.26404 | 2.874  | 307.26,225.19,93.07,69.07,67.05                                     | j |
| 211 | icos-5-enoic<br>acid    | 50.56 | C <sub>20</sub> H <sub>38</sub> O <sub>2</sub> | N | 309.27990 | 309.27972 | 2.952  | 309.28,95.09,81.07,67.05                                            | k |

Note: Compounds with “ \* ” were compounds have passed comparison verification with reference standards; N represents Negative Ion Mode, P

represents Positive Ion Mode; the calculation formula of the relative deviation value is 
$$Delat(ppm) = \frac{m/z_{Theoretical} - m/z_{Measured}}{m/z_{Theoretical}} \times 10^6$$
 ; a

represents Paeoniae Radix Alba, b represents Lonicerae Japonicae Flos, c represents Glycyrrhizae Radix Et Rhizoma, d represents Scrophulariae

Radix, e represents Angelicae Sinensis Radix, f represents Astragali Radix, g represents Phellodendri Chinrnsis Cortex, h represents Hirudo, i

represents Atractylodis Rhizoma, j represents Coicis Semen, k represents Scolopendra, l represents Scorpion.

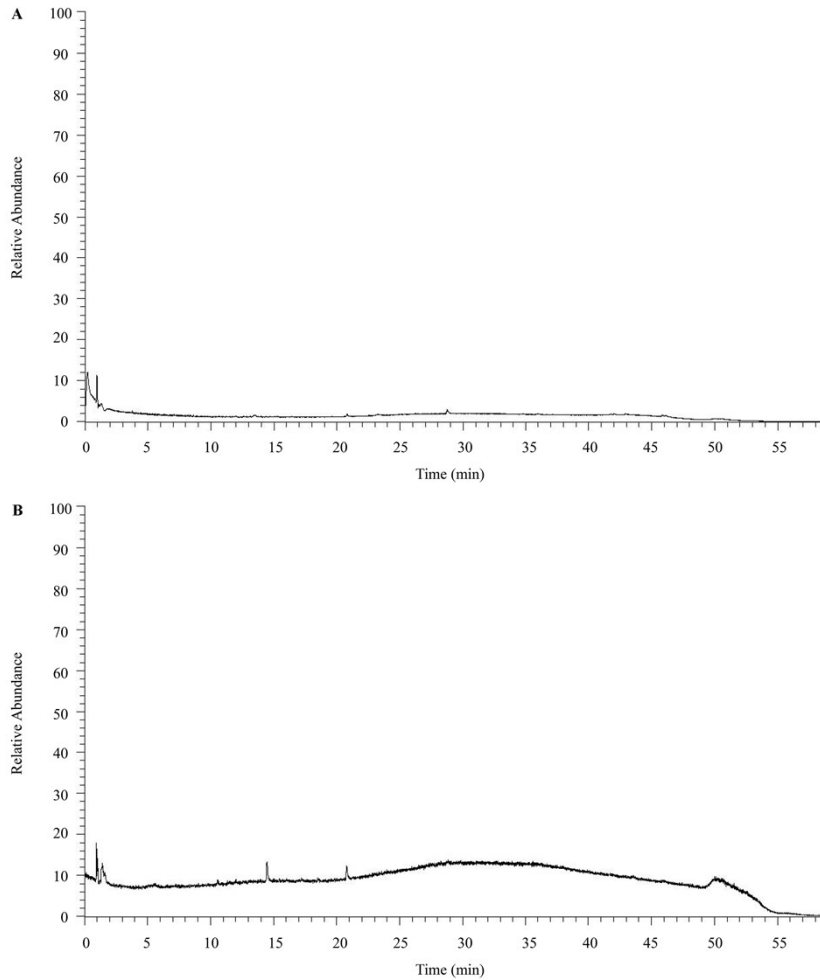

**Figure S1 Total ion chromatograms for blank control in positive ion mode (A) and negative mode (B).**

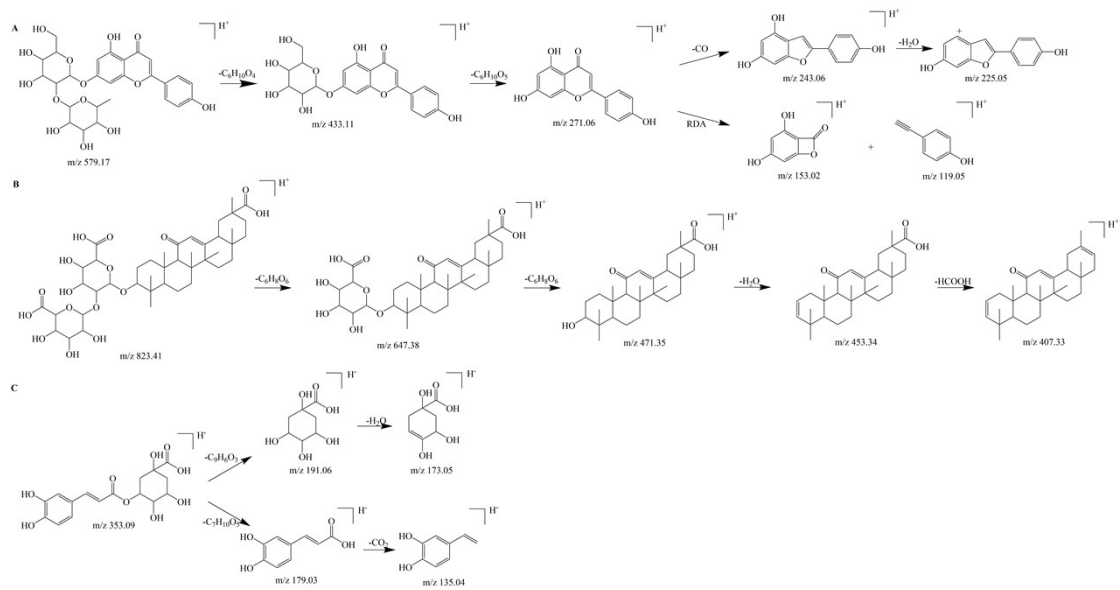

**Figure S2 MS fragmentation behaviors of flavonoids (A), triterpenes (B) and**

## phenolic acids (C)

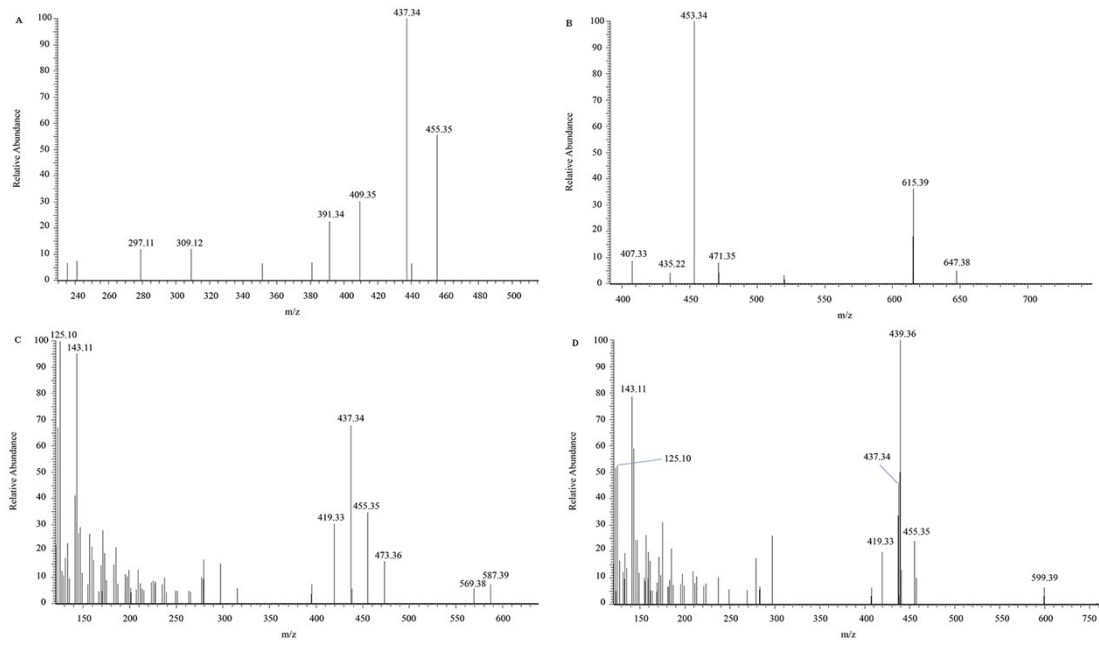

**Figure S3 MS/MS spectra of compound N<sub>1</sub> (A), N<sub>2</sub> (B), N<sub>3</sub> (C) and N<sub>4</sub> (D)**
